# Supplementary material for: Atypical Cartilaginous Tumors: Trends in Management
Source: PubMed Central journal article supplement (PMC8683228; doi:10.5435/jaaosglobal-d-21-00277), 2021-12-16
Supplement: jagrr-5-e21.00277-s004.pdf [file jagrr-5-e21.00277-s004.pdf]

**Supplemental Figure 2.** There was no change in the percent of patients who undergo wide resection by year.

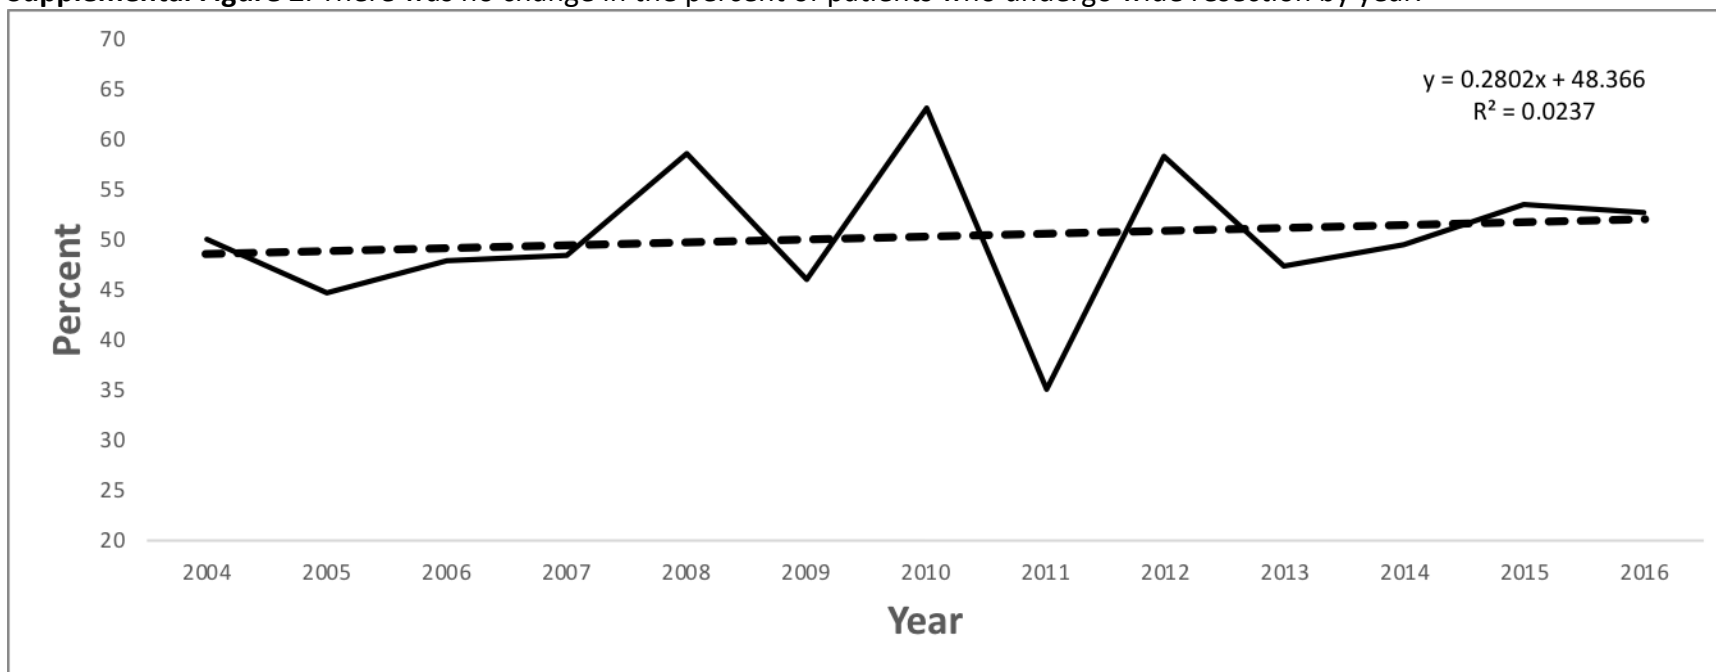

A Kendall's tau-b correlation was performed to determine trends in the percent of patients with a long bone atypical cartilaginous tumor who underwent wide resection procedures performed between 2004 and 2016. There was no statistically significant change in percent of patients who underwent wide resection ( $p = 0.530$ ).
